# Supplementary material for: Comparison of Two Different Immunohistochemical Quadruple Staining Approaches to Identify Innate Lymphoid Cells in Formalin-fixed Paraffin-embedded Human Tissue
Source: PubMed Central journal article supplement — J Histochem Cytochem. 2019 Dec 27;68(2):127–38. doi: 10.1369/0022155419897257 (PMC7003497; doi:10.1369/0022155419897257), 2019-12-27

**Supplementary Figure 1:** Identification of ILC2s in normal human colon by virtual quadruple staining. A single section of colon tissue is successively stained with GATA3 (A), CD56 (B), CD3 (C), and a cocktail of CD20/CD79 $\alpha$  (D) as described in figure 1. Figure E shows composite false color image with GATA3 (magenta), CD56 (green), CD3 (yellow), and a mix of CD20/CD79 $\alpha$  (white). Figure F shows a higher magnification of the framed area in E. Scale bar in A (=B, C, D, E): 100 $\mu$ m; F: 50 $\mu$ m.

**Supplementary Figure 2:** Identification of ILC3s in normal human colon by virtual quadruple staining. A single section of colon tissue is successively stained with ROR $\gamma$ t (A), CD56 (B), CD3 (C), and a cocktail of CD20/CD79 $\alpha$  (D) as described in figure 1. Figure E shows composite false color image with ROR $\gamma$ t (magenta), CD56 (green), CD3 (yellow), and a mix of CD20/CD79 $\alpha$  (white). Figure F shows a higher magnification of the framed area in E. Scale bar in A (=B, C, D, E): 100 $\mu$ m; F: 50 $\mu$ m.

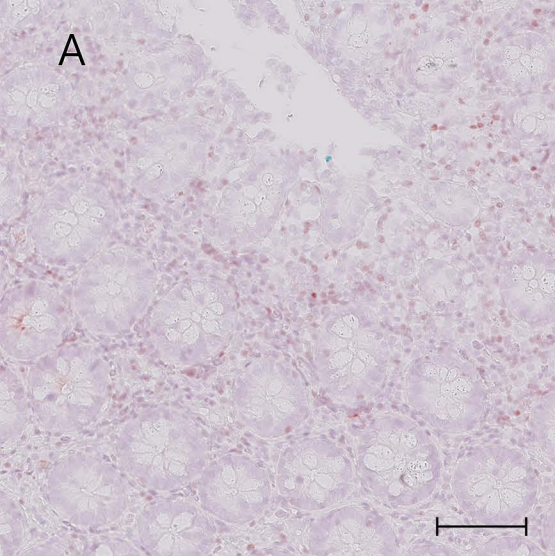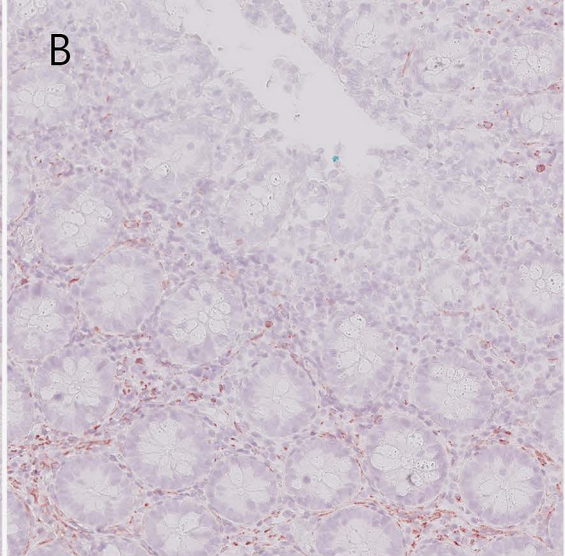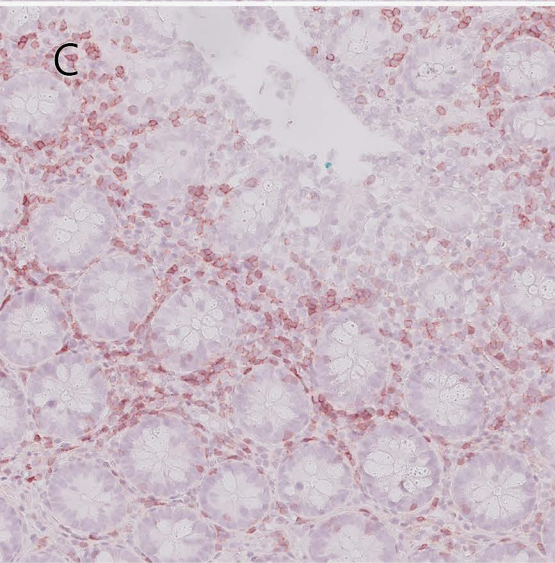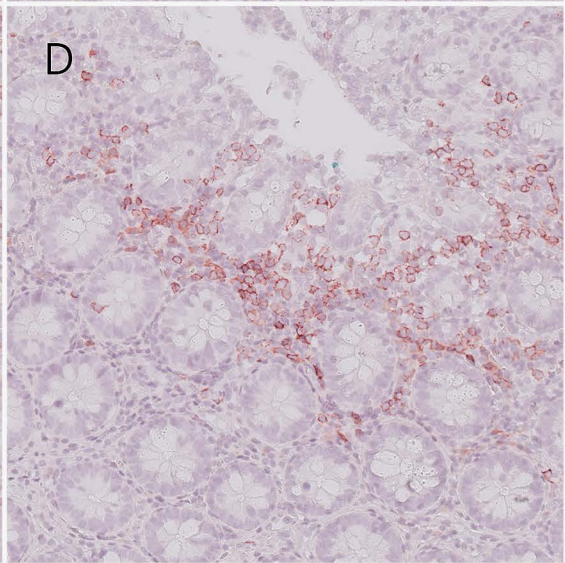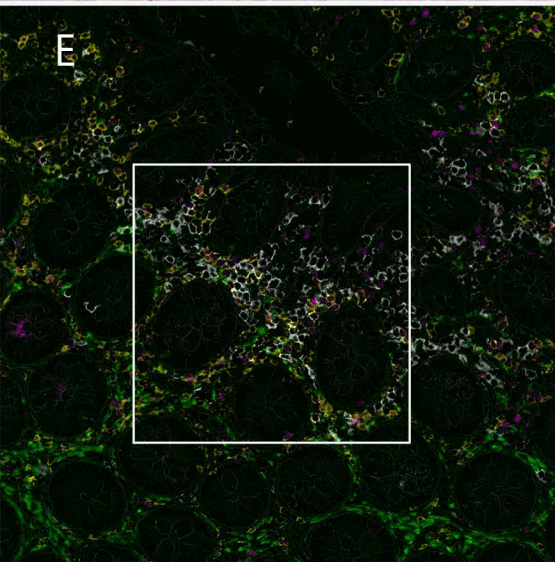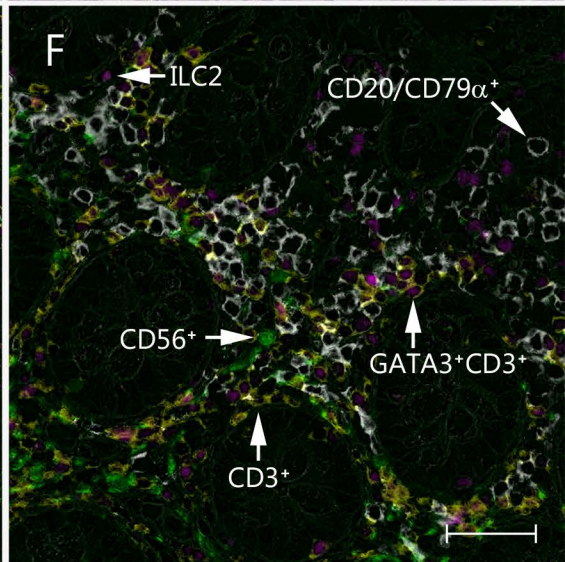

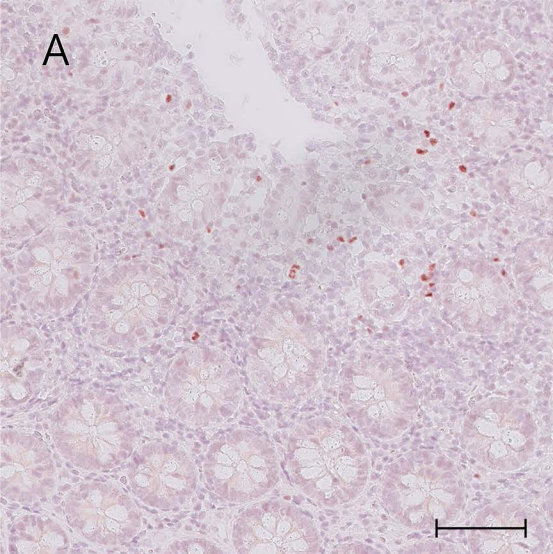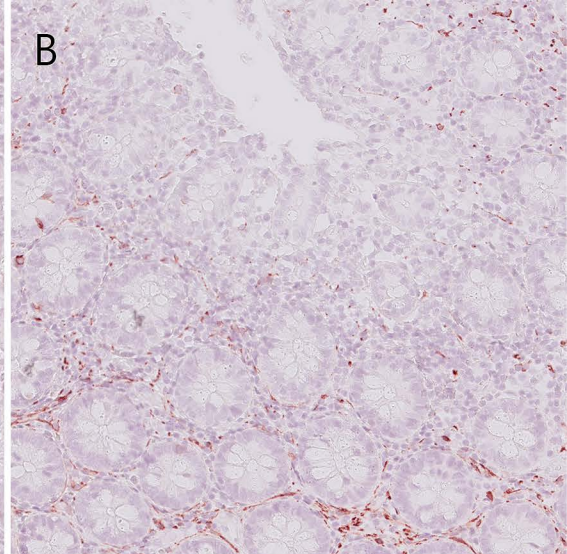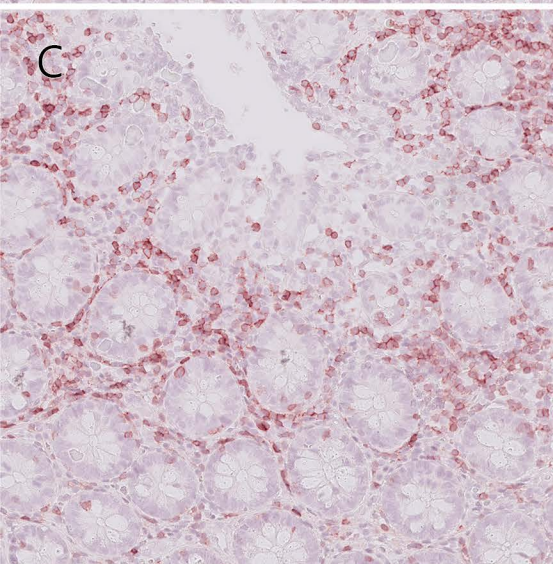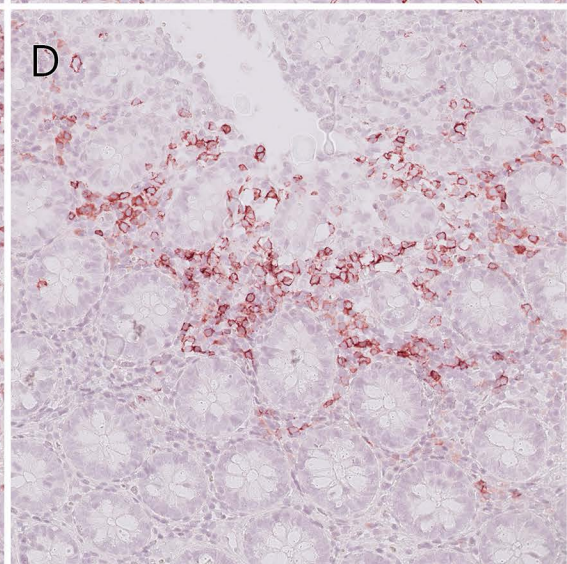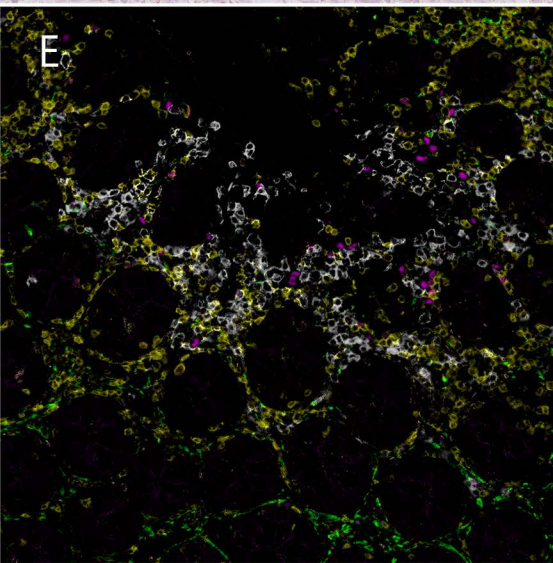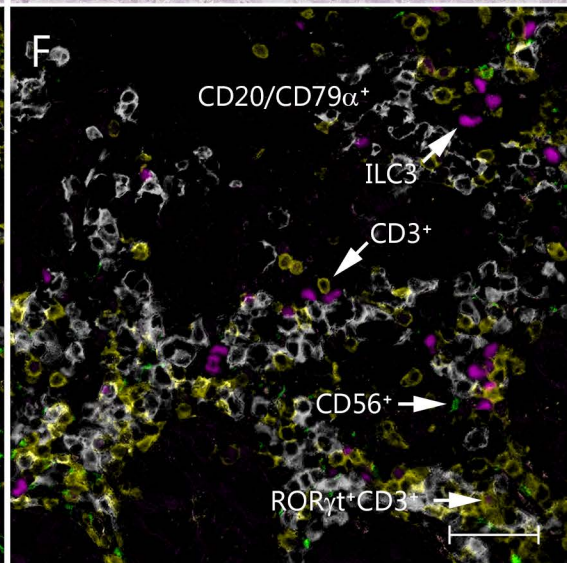

Supplement: 2019-00148R1_Production_Supplemental_Data_online_supp.pdf [file 2019-00148R1_Production_Supplemental_Data_online_supp.pdf]
